1 Intestinal microbiota changes due to *Giardia intestinalis* infections in a longitudinal Ecuadorian  
2 birth cohort and impact on cobalamin biosynthesis.

3  
4 Ashish Damania<sup>1</sup>, Andrea Arévalo-Cortés<sup>2,3</sup>, Andrea Lopez<sup>2</sup>, Victor Seco-Hidalgo<sup>4</sup>, Diana  
5 Garcia-Ramon<sup>2</sup>, Emilie Lefoulon<sup>5</sup>, Courtney Long<sup>5</sup>, Evan Drake<sup>5</sup>, Barton Slatko<sup>5,6</sup>, Philip J  
6 Cooper<sup>2,4</sup>, Rojelio Mejia<sup>\*2,6</sup>

- 7  
8 1. Platform for Innovative Microbiome and Translational Research, Department of Genomic  
9 Medicine, The University of Texas MD Anderson Cancer Center, Houston, Texas.  
10 2. School of Medicine, Universidad Internacional del Ecuador, Quito, Ecuador.  
11 3. Faculty of Human Health, Universidad Nacional de Loja, Loja, Ecuador.  
12 4. Institute of Infection and Immunity, St George's University of London, London, UK.  
13 5. Genome Biology Division, New England Biolabs, Inc, Ipswich, MA, USA.  
14 6. Department of Pediatrics – Tropical Medicine, Baylor College of Medicine, Houston, Texas.

15  
16 \*Corresponding author: Rojelio Mejia, [rmejia@bcm.edu](mailto:rmejia@bcm.edu)

17  
18  
19 Keywords: microbiome, cobalamin, vitamin B12, *Giardia intestinalis*

20  
21  
22  
23  
24  
25  
26  
27  
28  
29  
30  
31  
32  
33  
34  
35  
36  
37  
38  
39  
40  
41  
42  
43  
44  
45  
46  
47  
48  
49  
50  
51

52 **Abstract**

53 **Background:** *Giardia intestinalis* is a protozoal parasite infecting the gastrointestinal tract  
54 worldwide. Chronic infections/reinfections are common, with adverse nutritional consequences  
55 for critical growth during the first five years of life. Vitamin B12 (cobalamin) is absorbed primarily  
56 in the ileum of the small intestine, where *Giardia* trophozoites attach and replicate. Bacteria  
57 activate bioavailable vitamin B12, which is essential for human DNA synthesis and  
58 development. A disturbance in cobalamin biosynthesis caused by giardiasis may contribute to  
59 impairment of childhood development and growth.

60 **Methodology/Principal Findings:** We performed a longitudinal analysis on 61 Ecuadorian  
61 children using multi-parallel real-time quantitative PCR and whole genome sequencing.  
62 Children had increased *Giardia* DNA burden from ages 3 to 5 ( $p = 0.0012$ ) and 7.58 times more  
63 frequent *Giardia* infections (1.31 to 34.33,  $P = 0.0176$ ). There was an increased alpha diversity/  
64 *Giardia* fg/ $\mu$ l in three-year-olds compared to age-matched non-infected (30.20 vs 4.37,  $p =$   
65 0.050), but decreased alpha diversity/ *Giardia* fg/ $\mu$ l in five-year-olds compared to age-matched  
66 non-infected children (0.21 vs 4.31,  $p = 0.021$ ). Alpha diversity/ *Giardia* fg/ $\mu$ l was also  
67 decreased in samples collected longitudinally from the same children at five compared to 3  
68 years ( $p = 0.031$ ). Cobalt transport protein (*Cb/N*) (FDR < 0.003) and IPR011822 (Cobalamin-  
69 dependent methionine synthase) sequences were decreased in infected children ( $p < 0.002$ )  
70 and among those with greatest *Giardia* burdens ( $p < 0.001$ ).

71 **Conclusion/Significance:** *Giardia intestinalis* infection may affect bacterial diversity in the  
72 ileum where vitamin B12 is activated, as suggested by a reduced proportion of Cobalt transport  
73 protein component (*Cb/N*) gene sequences in the gut microbiome of infected children. These  
74 findings are potentially important to our understanding of how *Giardia* infections may affect  
75 childhood growth.

76

77 **Background**

78 Giardia is a common parasitic disease in humans in low-income settings. It is caused by the  
79 protozoan *Giardia intestinalis* (syn. *G. duodenalis* or *G. lamblia*) that infects humans through the  
80 ingestion of cysts present in a fecally-contaminated environment. Trophozoites, released in the  
81 stomach, adhere to and replicate in the small intestine, while in the jejunum, trophozoites  
82 transform back into cysts that are excreted in feces. Infections cause clinical manifestations  
83 ranging from an asymptomatic state to acute or chronic diarrhea, malabsorption, abdominal  
84 pain, vomiting, and nausea. Differences in clinical presentation may vary according to the  
85 infecting *Giardia* assemblage, infectious dose, age and nutritional status of the host, and  
86 specific effects of *Giardia* on gut microbiome composition (1,2) (3–6).

87 *G. intestinalis* is a common infection in children living in poorly hygienic conditions, and  
88 chronic infections impair growth and cognition (2). The prevalence of giardiasis among children  
89 in some of Ecuador's peri-urban and rural regions has been estimated between 20% and 31.5%  
90 (7–9). In contrast, in samples of children from Brazil and Colombia, prevalence was 44% and  
91 60%, respectively (10,11).

92 The vital role of maternal and early-life nutrition in physical and neural development (12)  
93 has been well described. Vitamin B12, or cobalamin, is a critical micronutrient exclusively  
94 biosynthesized by specific microbes in the gastrointestinal tract. Vitamin B12 is required during  
95 infancy and childhood to develop higher brain functions such as language and cognition. A  
96 deficiency can result in megaloblastic anemia and neurological complications such as sensory  
97 and motor disturbances and cognitive declines (13,14) (15). Vitamin B12 deficiency has been  
98 linked to decreased intrinsic factors, bacterial overgrowth, and parasitic infections, including  
99 *Giardia* (13,16). Cobalamin deficiency can also cause bacteria to shift elsewhere in the  
100 gastrointestinal tract and could disrupt microbial interactions (17).

101 Few studies have examined the interactions between the gut microbiome and vitamin  
102 B12. Degnan et al. (2014) described how most of the known human gut microbial species  
103 required B12 but lacked the genes necessary to synthesize B12 *de novo* - less than 25% of

104 intestinal bacterial species can synthesize vitamin B12(18). Vitamin B12 does not appear to  
105 affect the intestinal microbiome: an analysis of infants aged 4-6 months did not show alterations  
106 in the intestinal microbiota following vitamin B12 supplementation of vitamin B12 deficient infants  
107 (19). In contrast, vitamin B12 supplementation in patients with homocystinuria did not affect the  
108 alpha or beta diversity of the gut microbiome (20).

109 *Giardia* infections could affect vitamin B12 through its effects on the intestinal  
110 microbiome. Mejia et al. (2020) evaluated the potential impact of giardiasis on the interaction  
111 between the gut microbiome and vitamin B12, showing that *G. intestinalis* infected children had  
112 a higher abundance of the genus *Prevotella*, and reduced presence of *CbiM*, a gene involved in  
113 vitamin B12 biosynthesis, compared to uninfected children (21). Other protozoas, including  
114 *Giardia*, also show shifts in microbial communities(22).

115 In the present study, we hypothesized that *Giardia* infections alter the gut microbiome,  
116 causing changes in bacterial species that activate vitamin B12 and may deplete bioavailable  
117 vitamin B12, contributing to growth impairment in young children. To test this hypothesis, we did  
118 a taxonomic and metagenomic analysis of the bacterial microbiome from fecal samples  
119 collected longitudinally from Ecuadorian children at 3 and 5 years of age who were infected (or  
120 not) with *G. intestinalis* as determined using multi-parallel real-time quantitative PCR (qPCR).  
121 Our analyses of the bacterial microbiome of the gut focused on the diversity of bacteria and their  
122 vitamin B12 activating sequences.

123

## 124 **Methods**

### 125 *Sample selection and study procedures*

126 For the present study, we used a nested sample of children that were randomly selected from a  
127 birth cohort of 2,404 newborns followed up from birth to 8 years of age and living in the rural  
128 District of Quinde, Esmeraldas Province, in tropical coastal Ecuador (23). For the present  
129 study, we selected 61 stool samples from children collected at 3 and 5 years of age with 1) a

130 known positive or negative result for *G. intestinalis* DNA using qPCR and 2) who were negative  
131 for the presence of DNA from other gastrointestinal parasites (*Ascaris*  
132 *lumbricoides*, *Ancylostoma duodenale*, *Necator americanus*, *Strongyloides stercoralis*,  
133 *Trichuris trichiura*, *Cryptosporidium* species, and *Entamoeba histolytica*) (9). None of the  
134 children had received antibiotics within three months of stool samples being collected. After the  
135 study sample collection, all children with positive gastrointestinal parasite results were treated  
136 with appropriate anti-parasitic medication. Paired stool samples at 3 and 5 years were available  
137 for 27 children, while unpaired samples from 7 children were available at 3 or 5 years of age.

138 Data on sociodemographic, individual, and household factors were collected by maternal  
139 questionnaire around the time of birth of the child. A trained member of the study team  
140 administered the questionnaire.

141  
142 *Ethics statement*  
143 Informed written consent was obtained from a parent or guardian of each child. The study  
144 protocols were approved by the Bioethics Committee of the Universidad Internacional De  
145 Ecuador, Quito, Ecuador. From the parent study, the results of stool microscopy were given to  
146 the parent/guardian and anti-parasite treatment was provided where appropriate. The study was  
147 also approved by the Baylor College of Medicine, institutional review board H-33219.

148  
149 *Parasite sample preparation*  
150  
151 Stool samples were stored in ice and air-tight containers immediately after collection for later  
152 DNA extraction using MP FastDNA Spin Kits for Soil (MP Biomedicals, Irvine, CA). DNA from  
153 samples stored at -20° C and processed by multi-parallel qPCR (*G. intestinalis*, *A.*  
154 *lumbricoides*, *A. duodenale*, *N. americanus*, *S. stercoralis*, *T. trichiura*, *Cryptosporidium* species,  
155 and *E. histolytica*) as described (9,24).

156  
157 *Microbiome sequencing*

158 Microbiome sequencing was performed at New England Biolabs, Inc. Preparation included  
159 removing methylated DNA with NEBNext® Microbiome enrichment kit with no size selection. All  
160 samples used one µg of DNA with eight cycles of PCR enrichment (NEBNext Ultra DNA Library  
161 Prep Kit for Illumina, Version 5.1, 9/17). Illumina NextSeq (Illumina, San Diego, CA) or Illumina  
162 MiSeq (Illumina, San Diego, CA) was used to produce 151bp reads (single and paired-end);  
163 however, only NextSeq sequencer reads were retained for downstream analysis.

164

### 165 *Bioinformatics analysis*

166 Paired ends were interleaved using the BMap program (version 38.73) to convert all  
167 fastq reads to single-end reads for downstream processing (25). All single-end fastq reads were  
168 filtered using a fastp program set at a minimum Phred score of 15 and a minimum length set at  
169 50bp (26). MultiQC was used to visualize and summarize the filtered fastq reads (27). The NR  
170 database was downloaded in fasta format from <ftp://ftp.ncbi.nlm.nih.gov/blast/db/FASTA/> on  
171 19<sup>th</sup> December 2019 as the reference database (28). Filtered fastq reads were processed using  
172 Diamond (Version v0.9.29) with blastx mode at the default setting and maximum target  
173 sequences set to one (29). Output from Diamond was processed to extract taxonomy and  
174 InterPro protein database results using the Megan (community edition version 6.20.17) program  
175 in STAMP format (30–32).

176

### 177 *Taxonomic and metagenomic analysis*

178 The resultant taxonomy text file was imported into Phyloseq for calculating Shannon  
179 alpha-diversity (species richness) and beta-diversity (species variability) (33). The “dplyr”  
180 package was used for data transformation within the R programming language environment  
181 (34,35).

182 Taxonomic data were filtered to remove reads less than 500 reads in 20% (12 of 61  
183 samples) of the total samples. Any reads from phylum chordate were removed to filter for

184 possible human reads. Batch effects were investigated using an ordinate function from the  
185 Phyloseq package with the “bray” distance method and Principal Coordinate Analysis (PCoA).  
186 The InterPro database was searched for using the keyword "cobalamin" to manually extract all  
187 vitamin B12 biosynthesis and transporter genes using InterPro entry ID and description, which  
188 resulted in 142 proteins<sup>[1]</sup>.

189 The taxonomic and InterPro results from individual samples were exported in tab-  
190 delimited file format and subsequently merged using the "merge\_metaphlan\_table.py" Python  
191 script, which was included with metaphlan software version 2.2.0 (36). Vegan package was  
192 used to determine beta-diversity metrics, including PERMANOVA and beta-dispersion among  
193 the *Giardia* quartile (zero to three), reflecting the intensity of *Giardia* DNA found via qPCR,  
194 *Giardia* infection status and anthropometric scores (37). MaAsLin2 was used to test for  
195 differentially abundant taxa with minimum prevalence of 25% and minimum abundance of 100  
196 reads (38). *Giardia* parasite burden was measured in 4 ordinal groups that included uninfected  
197 children and the 3 of 4 quartiles of increasing concentrations of *Giardia* DNA (1<sup>st</sup> (0.01 – 0.15),  
198 2<sup>nd</sup> (0.17-24.50) and 3<sup>rd</sup> (118.58 – 29946.58). Differential analysis for genes from metagenomic  
199 data was performed using the corncob package (39) with “differentialTest” function. Statistically  
200 significant results were further run through “bbdml” function to obtain an effect size estimate  
201 using maximum likelihood. Lastly, “plot\_bbdml” function on the bbdml output with 10,000  
202 bootstrap simulations was used to obtain a 95% confidence interval of individual relative  
203 abundance values.

## 204

### 205 *Statistical analysis*

206 The Kruskal-Wallis test was used to compare three or more independent groups. Pairwise  
207 Wilcox tests were used as post-hoc tests with a false discovery rate as a p-value correction  
208 method. Statistical significance was set at  $p < 0.05$ , and the false-discovery rate was set at 0.05  
209 for all tests. Linear mixed effect models were conducted using the lmerTest R package (40).

210 Graphs were created using Prism Version 10.3.0 (Graphpad Software, Boston, MA) and the R  
211 ggplot2 package (41).

212

## 213 Results

### 214 Comparing *Giardia* DNA burden and assemblage among infected children

215 There was a significant increase in the *Giardia* DNA burden at five compared to three years  
216 among samples from all children with evidence of infection at both ages ( $p=0.0012$ ) (**Figure**  
217 **1A**), and this was also seen in paired samples ( $p=0.031$ ) (**Figure 1B**).

218

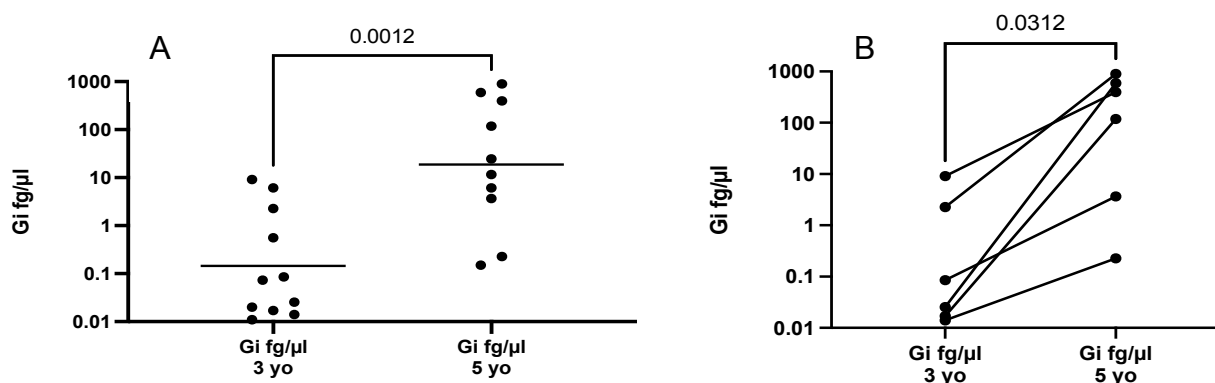

219 Figure 1: A. Higher levels of *Giardia* DNA in 5-year-old infected children compared to three-  
220 year-old infected children (0.145 vs 18.76 fg/μl,  $P = 0.0012$ ). B. In individually *Giardia*-infected  
221 children, there was a significant increase in *Giardia* DNA burden in paired samples ( $P =$   
222 0.0312).



223 If a 3-year-old was infected with *Giardia*, there were 7.58 greater odds (95% CI 1.31-  
224 34.33,  $P = 0.0176$ ) of having giardiasis at five years old (**Figure 2**). Using A and B assemblage

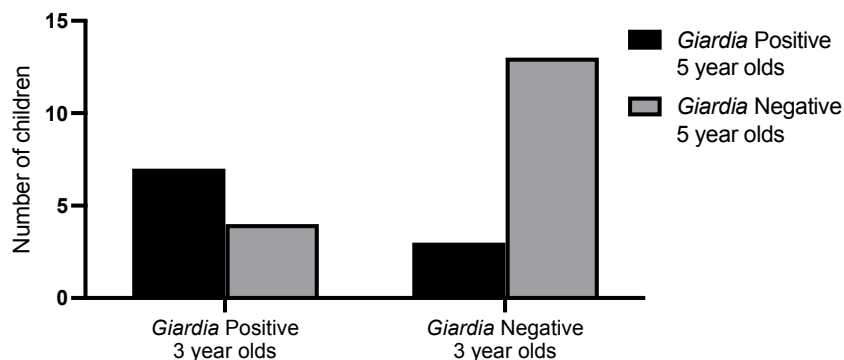

225 sequences, we detected 45.9% assemblage A, 49.2% assemblage B, and 82.1% with both A  
226 and B assemblages. Because of the large percentage of mixed assemblages in this cohort,  
227 assemblages were not considered for the analysis.

228

229 Figure 2. Children infected with *Giardia* at three years had a 7.58 greater odds of being infected  
230 at five years (1.31 to 34.33,  $P = 0.0176$ ).

### 231 *Alpha diversity of infected and non-infected children*

232 Alpha diversity, measuring gut microbiome species diversity using the Shannon index, did not  
233 differ significantly by *Giardia* parasite burden between these two groups; there were no  
234 significant differences relative to *Giardia* DNA abundance (**Supplemental Figure 1**) or between  
235 age or sex (**Supplemental Figure 2**).

236 To incorporate the impact of *Giardia* DNA burden on bacterial alpha diversity, a ratio of  
237 alpha diversity was divided by *Giardia* DNA fg/ $\mu$ l was calculated for each sample. There was  
238 some evidence of increased alpha diversity/ *Giardia* fg/ $\mu$ l in three-year-olds compared to age-  
239 matched non-infected (30.20 vs. 4.37,  $p = 0.050$ ), but decreased alpha diversity/ *Giardia* fg/ $\mu$ l in  
240 five-year-olds compared to age-matched non-infected children (0.21 vs 4.31,  $p = 0.021$ ).

241 Individual children that were *Giardia* positive at both time points at three and five years showed  
242 a decrease in the ratio of alpha diversity relative to *Giardia* DNA concentration fg/ $\mu$ l ( $p = 0.022$ ).

243 In the presence of *Giardia* infection, alpha diversity was greater in relation to *Giardia* DNA (fg/ $\mu$ l)  
244 in three compared to five-year-olds and also compared to *Giardia*-negative children (Kruskal-

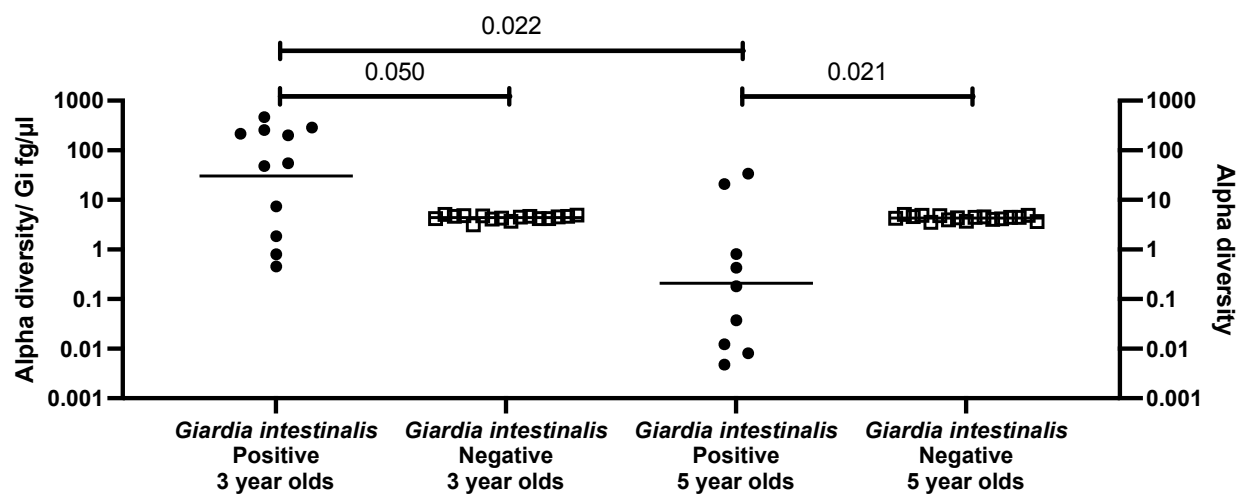

245 Wallis,  $p = 0.0053$ ) (**Figure 3**).

246

247 Figure 3. Alpha diversity normalized to concentration (fg/ $\mu$ l) of *Giardia intestinalis* DNA in  
248 infected children aged three-year-olds was higher than in non-infected three-year-olds (30.20 vs  
249 4.37,  $p = 0.050$ ). The opposite was seen in five-year-olds infected and non-infected (0.21 vs  
250 4.31,  $p = 0.021$ ). There was also a decrease in alpha diversity/ *Gi* fg/ $\mu$ l in the five-year-olds and  
251 an overall difference between all cohorts ( $p = 0.0053$ ). For children without *Giardia*, their results  
252 are on the Y2 axis and are labeled Alpha Diversity.

253 In paired samples, there was a similar decrease in Alpha diversity/ *Gi* fg/ $\mu$ l in the five-  
254 year-olds ( $p = 0.031$ ) with no differences in the other paired groups (**Figure 4**).

255

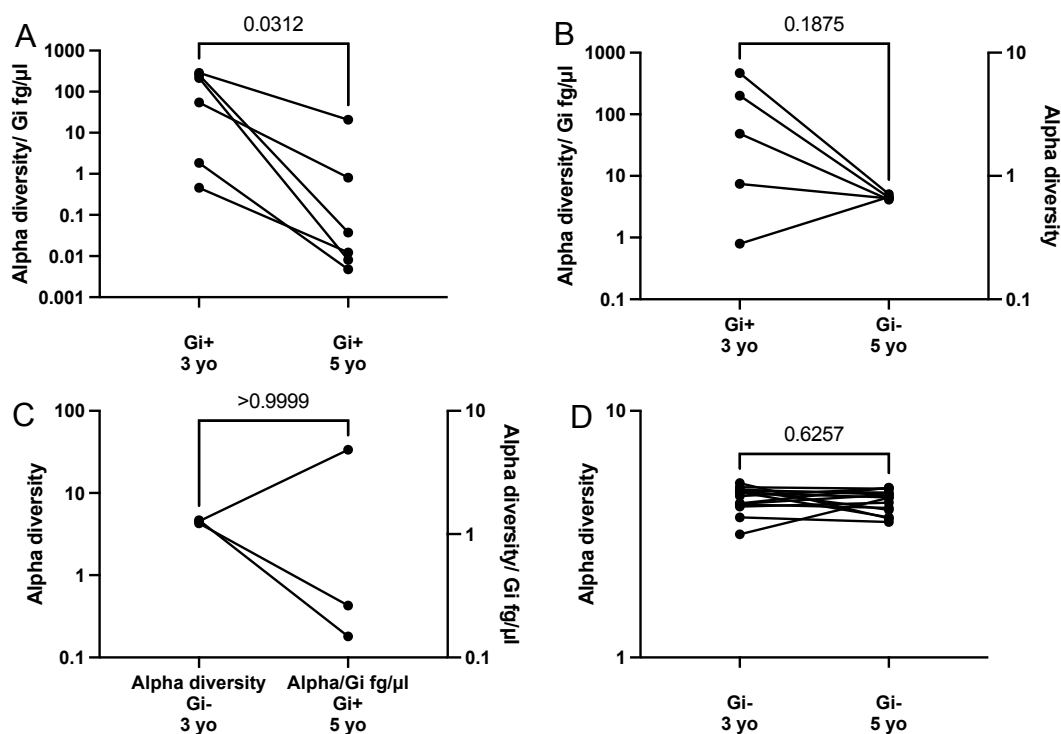

256

257 Figure 4. Paired results of Alpha diversity normalized to *Giardia* DNA concentrations (fg/μl)  
258 between infected and non-infected children. There was a decrease in Alpha diversity/ *Giardia*  
259 fg/μl in five-year-old children compared to three-year-olds (p = 0.031).

260

261

262 *Beta Diversity in Giardia infected and non-infected children.*

263 For three-year-old children, there was no difference in beta diversity between *Giardia*, which  
264 was positive and negative ( $R^2 = 0.032$ ,  $p = 0.401$ ). For five-year-old children, there was no  
265 difference in Beta diversity between *Giardia* positive and negative ( $R^2 = 0.0262$ ,  $p = 0.837$ )  
266 **(Supplemental Figures 3)**. Exploration of independent effects of *Giardia* infection status or  
267 *Giardia* quartile, age, and sex on distance matrix calculated using PERMANOVA did not reveal  
268 any statistically significant terms to explain variance **(Supplemental Table 1)**. Variance in beta  
269 diversity between groups did not differ by *Giardia* infection status or across ordinal groups of

270 parasite burden. Beta dispersion plots, ANOVA, and permutation tests with 10,000 permutations  
 271 confirmed no significant difference in variance by *Giardia* infection quartiles for three-year-olds  
 272 ( $p = 0.842$ ) or five-year-olds ( $p = 0.796$ ) (**Supplemental Figure 2**).

273  
 274 *Differential Taxonomic differences*

275 Differential abundance analysis was conducted to see possible changes at the species and  
 276 genus level with respect to infection status, the latter allowing comparisons with other 16S rRNA  
 277 gene sequencing studies. MaAsLin2 analysis (differential test function) was done to identify  
 278 OTUs that were differentially abundant relative to *Giardia* infection. Species were differentially  
 279 abundant and positively enriched in uninfected compared to infected children in 3-year-olds  
 280 (**Figure 5A**) and 5-year-olds (**Figure 5B**). All genus and species OTUs shown have  $FDR < 0.05$ .  
 281 At the species level, we saw bacteria belonging to the genera *Veillonella*, *Clostridium*, and  
 282 *Enterobacter* more abundant in infected children. Uninfected children had abundant  
 283 *Ruminococcus*, *Bacteroides*, and *Eubacterium* species compared to *Giardia*-infected children of  
 284 the same age (**Figure 5**)

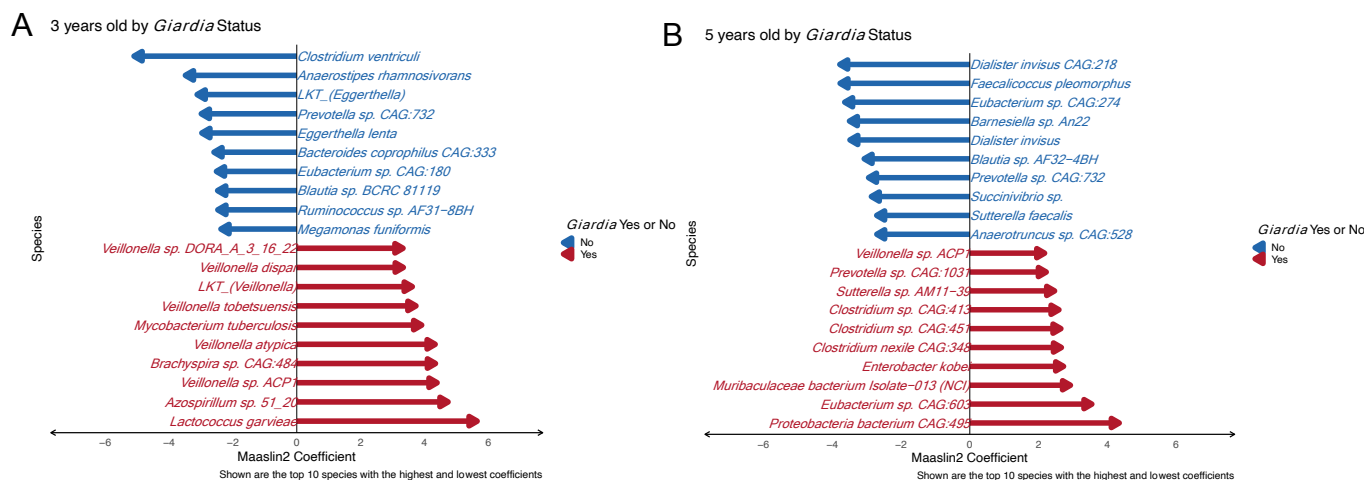

286  
 287 Figure 5: Top differentially abundant OTUs at species level comparison of *Giardia* infected  
 288 versus uninfected children controlling for three-year-olds (A) and five-year-olds (B).

289 A comparison of paired samples infected with *Giardia* DNA with uninfected children  
 290 showed 33 OTUs at genus and 132 at species levels to be differentially abundant. Differentially  
 291 abundant taxa between these groups included the genera *Bacteroides* sp. *Ruminococcus* sp.  
 292 and *Mycoplasma* sp. were also observed among the top 20 OTUs at the species level (**Figure**  
 293 **6A**). Children who were initially not infected at three years old and then positive at 5-years-old  
 294 had several *Prevotella* species (**Figure 6B**). Three-year-old infected children had more  
 295 *Bacteroides* sp., *Paraprevotella* sp., and *Acinetobacter* sp. compared to non-infected five-year-  
 296 olds had more *Ruminococcus* sp, *Bifidobacterium longum*, and *Eubacterium* sp. (**Figure 6C**).  
 297 Children of both ages had fewer bacterial differences than the other cohorts (**Figure 6D**).  
 298

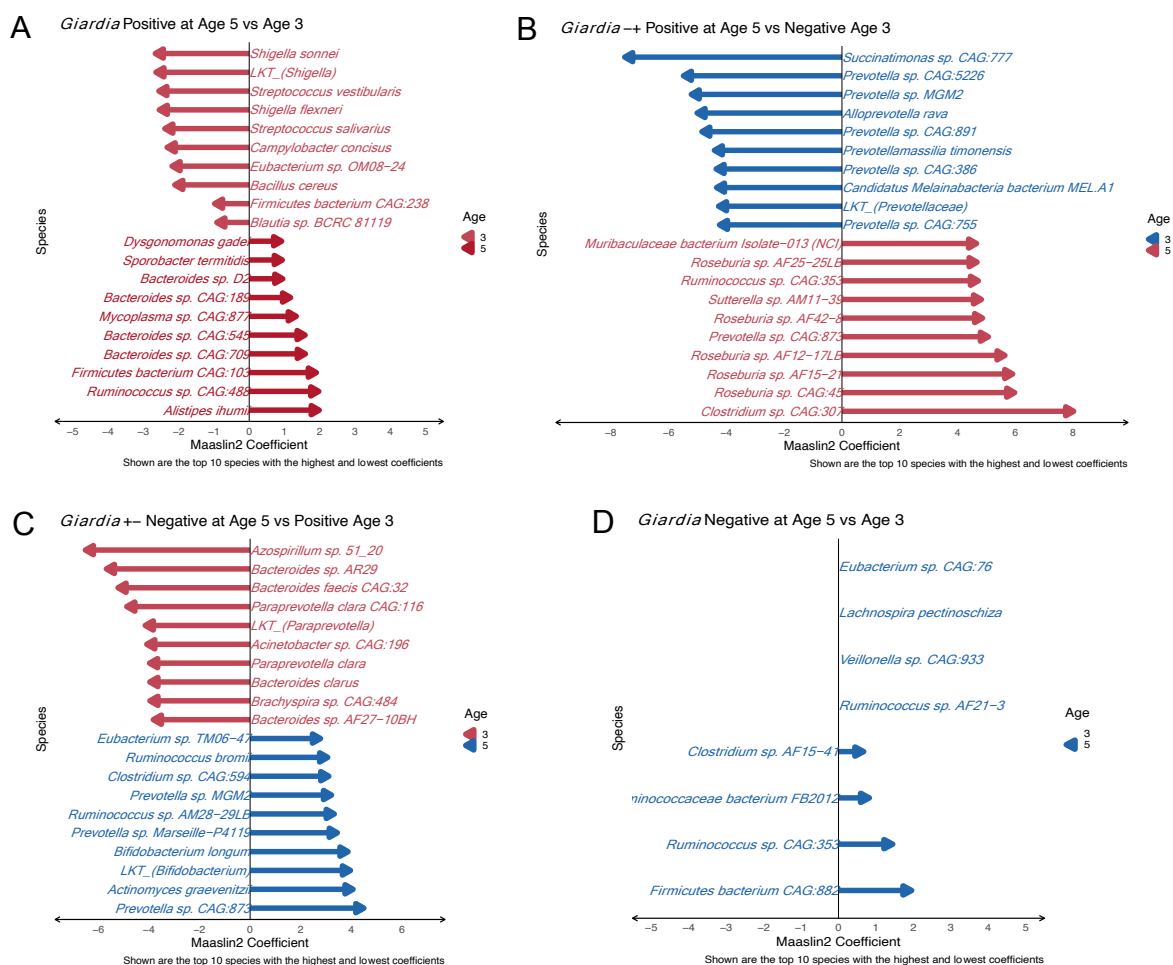

299

300 Figure 6. Top 20 differentially abundant OTUs at genus and species level for *Giardia* positives  
301 at both ages (A), the non-infected at three years old and then infected at five years old (B), and  
302 those infected at three years old and then non-infected at five years old (C). Only 8 OTUs were  
303 significantly different in abundance for those children not infected at both ages (D).

304

#### 305 *Differential abundant cobalamin genes*

306 Out of 143 vitamin B12 biosynthesis genes, 32 genes were found to be present among the 61  
307 samples. When conducting a differential abundance test from the Corncob package by *Giardia*  
308 infection status using beta-binomial regression with sex and age as covariates, IPR003705 –  
309 Cobalt transport protein (*CbiN*) was found to be significantly in low abundance in *Giardia*-  
310 *positive* children with FDR < 0.001. *CbiN* was further tested individually with sex and age as  
311 covariates. It was found to be less prominent in the *Giardia-positive* group with  $p = 0.002$ . The  
312 resultant graph shows the predicted confidence interval of the *CbiN* gene in samples after  
313 10,000 bootstrap simulations (**Figure 7A**).

314 Notably, the differential abundant test with *Giardia* quartile instead of *Giardia* infection  
315 status indicated genes coding for IPR003705 – Cobalt transport protein (*CbiN*) (FDR < 0.003)  
316 and IPR011822 (Cobalamin-dependent methionine synthase) with FDR = 0.003 were found to  
317 be statistically significantly differentially abundant in the *Giardia* negative group vs. *Giardia*  
318 positive group, with sex and age as covariates.

319 Differential analysis of these genes was individually analyzed to get estimates by the  
320 *Giardia* quartile. For the *CbiN* gene, the remaining *Giardia* quartiles (2 and 3), as compared to  
321 the no *Giardia* quartile, had statistically significant negative abundances with  $p = 0.01$  and  $p <$   
322  $0.001$ , respectively (**Figure 7B**). The predicted intervals from the differential abundance testing  
323 for *CbiN* alone are noticeably higher in the *Giardia-positive* group.

324

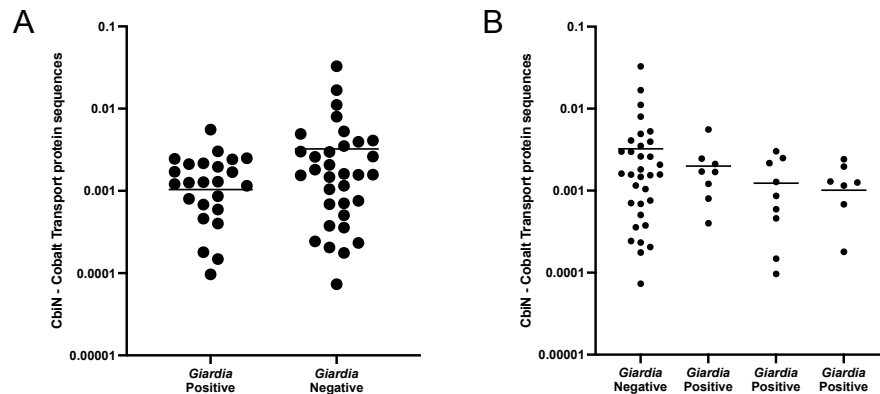

325 Figure 7. Relative abundance of the CbiN gene was decreased in children infected with *Giardia*  
326 compared to non-infected children (A). Relative abundance of CbiN gene among all the samples  
327 by *Giardia* concentration quartiles, Neg (0), and increasing concentrations (1, 2, 3). The  
328 prediction intervals are calculated using 10,000 bootstrap simulations.

329

## 330 Discussion

331 *Giardia* infections are estimated to be present in about one-third of developing countries'  
332 children and adult populations (42). Microbiome perturbation due to *Giardia* infection was  
333 minimal compared to *Giardia*-negative children, as there were no significant changes in the  
334 alpha-diversity and beta-diversity between the groups. Our results also show a non-significant  
335 increase in the alpha diversity with age. A study conducted on 417 Swedish children from  
336 newborn to five years of age found that the compositional variation was the least between three  
337 and five years (0.9%) (43). This indicates that microbiome changes between these time points  
338 are leveling out as they may be approaching an adult-like state. Such a decline in change may  
339 have flattened *Giardia*'s impact on diversity changes. Mice studies have shown an increase in  
340 Shannon alpha-diversity or richness in species following *Giardia* infection, while other studies  
341 have found no alterations (3,5,44). However, these studies were conducted with 16S rRNA  
342 sequencing and murine models. Microbiome studies in humans show that *Giardia* infection can

343 reduce alpha diversity (6,21) or distinctive microbial profiles in individuals with asymptomatic  
344 versus symptomatic giardiasis(45). Toro-Londono et al. found significant changes in beta  
345 diversity in the *Giardia* group vs. the control group(46).

346 It is speculated that the amount of *Giardia*, or its burden, is related to disease  
347 progression, including changes in the intestinal microbiota(47). Therefore, we used the amount  
348 of *Giardia* DNA, in fg/ $\mu$ l, to modulate the microbial alpha diversity by mathematically dividing  
349 them and creating a ratio of alpha diversity/ *Giardia* fg/ $\mu$ l of DNA. This ratio explores how  
350 *Giardia's* DNA burden affects microbial alpha diversity per infected child.

351 This study revealed a number of differentially abundant taxa, which may help understand  
352 the microbiome changes caused by the *Giardia* infection. It was not possible to distinguish the  
353 stool sample bacteria from the various intestinal regions. However, the small intestine has a  
354 higher oxygen level and less bacteria density than the colon due to the antimicrobial activity of  
355 bile acids (48). Samples with the highest *Giardia* infection showed abundant anaerobic species  
356 from *Clostridium* and *Veillonella* (**Figure 5**), which reside in the duodenum and cause biofilms in  
357 vitro (49,50). Biofilms can lead to pathogenesis, antimicrobial resistance, virulence, and  
358 restructure the microbiome (51). Interestingly, *V. atypica* from genus *Veillonella* is a lactate  
359 metabolizer in a low pH environment such as the small intestine and may negate some of the  
360 probiotic effects of lactic acid-producing bacteria *Lactobacillus* and *Bifidobacterium* on *Giardia*  
361 (52,53).

362 Cobalamin is absorbed by Intrinsic factor (IF) at the cobalamin complex at the receptors  
363 in the ileum. It is known that cobalamin absorption can be impacted by small intestine bacterial  
364 overgrowth (SIBO) due to competition with IF (54). Some microbes, such as *Bacteroides*  
365 *thetaiotaomicron*, can remove cobalamin from IF with BtuG2 protein and compete directly with  
366 the human host (55). This study found bacteria containing *BtuG* homologs, such as *B.*  
367 *coprophilus*, with lower abundance in the highest *Giardia* quartile than the *Giardia* negative  
368 group.



369 Specific cobalamin biosynthesis sequences were decreased in the *Giardia-positive*  
370 groups, showing that the microbiome was deficient in cobalamin generation genes. Changes in  
371 microbiome diversity and the low presence of *BtuG* homologs bacteria may have been due to  
372 the effects of *Giardia* infection in these children. Corncob analysis limited to cobalamin-related  
373 genes revealed the lack of *CbiN* – a cobalt transporter protein among the *Giardia* positive  
374 groups, suggesting an indirect impact on activating cobalamin and discordance at the individual  
375 vital amino acid level. In a larger study, children with giardiasis had broad amino acid  
376 deficiencies(56). The available data in this study cannot determine whether the lack of the *CbiN*  
377 gene impacts the overall cobalamin availability across the gut microbiome.

378 Limitations of this study include the lack of statistical power across relatively small  
379 samples of children sampled at 3 and 5 years of age. Also, serum levels of cobalamin were  
380 unavailable, and metabolomics data could not correlate with microbiome findings or  
381 anthropometric measures. Finally, a gap of a two-year timeframe between sample collection  
382 may be comparatively long to detect microbiome changes.

383

## 384 **Conclusion**

385 This longitudinal analysis observed a decrease in alpha diversity normalized to *Giardia* DNA  
386 (fg/ $\mu$ l) concentration as children increased in age from 3 to 5 years old, revealing the impact on  
387 microbiome diversity changes as children age. Differential taxa abundance analysis showed  
388 microbiome changes at genus and species levels, which could allow biofilm formation and  
389 reduction in potentially beneficial butyrate-producing bacteria. There were also fewer cobalamin  
390 synthesis genes among the microbiomes of the children with a higher infectious burden of  
391 *Giardia*. These findings may help understand the mechanism of how *Giardia* may lead to growth  
392 delays and stunting.

393

394 **Funding:** Internal funds from New England Biolabs for DNA sequencing. Research funding was  
395 provided by the US Department of Health and Human Services, Health Resources and Services  
396 Administration for Baylor College of Medicine Center of Excellence in Health Equity, Training,  
397 and Research (Grant No: D34HP31024). Also, the Baylor College of Medicine Junior Faculty  
398 Seed Award and BCM Center for Globalization Pilot Project were used for research supplies.  
399 Also, Wellcome Trust grant 088862/Z/09/Z.

400  
401 **Authors' contributions:** RM and AD were responsible for bioinformatics and statistical  
402 analysis. RM, AA, AL performed DNA extraction, qPCR, demethylation, and library preparation.  
403 EL, CL, ED, BS were involved in the DNA sequencing sample reactions  
404 and preliminary analysis. RM, AD, VSH, DGR, BS, PJC wrote the manuscript. All authors read  
405 and approved the final manuscript.  
406

## 407 **References**

- 408  
409
- 410 1. Certad G, Viscogliosi E, Chabé M, Cacciò SM. Pathogenic Mechanisms of *Cryptosporidium*  
411 and *Giardia*. *Trends Parasitol.* 2017 Jul 1;33(7):561–76.
  - 412 2. Halliez MC, Buret AG. Extra-intestinal and long term consequences of *Giardia duodenalis*  
413 infections. *World J Gastroenterol WJG.* 2013 Dec 21;19(47):8974–85.
  - 414 3. Beatty JK, Akierman SV, Motta JP, Muise S, Workentine ML, Harrison JJ, et al. *Giardia*  
415 *duodenalis* induces pathogenic dysbiosis of human intestinal microbiota biofilms. *Int J*  
416 *Parasitol.* 2017 May 1;47(6):311–26.
  - 417 4. Huth S von, Thingholm LB, Kofoed PE, Bang C, Rühlemann MC, Franke A, et al. Intestinal  
418 protozoan infections shape fecal bacterial microbiota in children from Guinea-Bissau. *PLoS*  
419 *Negl Trop Dis.* 2021 Mar 3;15(3):e0009232.
  - 420 5. Riba A, Hassani K, Walker A, Best N van, Zeschwitz D von, Anslinger T, et al. Disturbed  
421 gut microbiota and bile homeostasis in *Giardia*-infected mice contributes to metabolic  
422 dysregulation and growth impairment. *Sci Transl Med [Internet].* 2020 Oct 14 [cited 2021  
423 Mar 9];12(565). Available from: <https://stm.sciencemag.org/content/12/565/eaay7019>
  - 424 6. Toro-Londono MA, Bedoya-Urrego K, Garcia-Montoya GM, Galvan-Diaz AL, Alzate JF.  
425 Intestinal parasitic infection alters bacterial gut microbiota in children. *PeerJ.* 2019 Jan  
426 7;7:e6200.
  - 427 7. Jacobsen KH, Ribeiro PS, Quist BK, Rydbeck BV. Prevalence of intestinal parasites in  
428 young Quichua children in the highlands of rural Ecuador. *J Health Popul Nutr.* 2007  
429 Dec;25(4):399–405.
  - 430 8. Lowenstein C, Vasco K, Sarzosa S, Salinas L, Torres A, Perry MJ, et al. Determinants of  
431 Childhood Zoonotic Enteric Infections in a Semirural Community of Quito, Ecuador. *Am J*  
432 *Trop Med Hyg.* 2020 Mar 30;102(6):1269–78.

- 433 9. Mejia R, Vicuña Y, Broncano N, Sandoval C, Vaca M, Chico M, et al. A Novel, Multi-  
434 Parallel, Real-Time Polymerase Chain Reaction Approach for Eight Gastrointestinal  
435 Parasites Provides Improved Diagnostic Capabilities to Resource-Limited At-Risk  
436 Populations. *Am J Trop Med Hyg.* 2013 Jun 5;88(6):1041–7.
- 437 10. Bryan PE, Romero M, Sánchez M, Torres G, Gómez W, Restrepo M, et al. Urban versus  
438 Rural Prevalence of Intestinal Parasites Using Multi-Parallel qPCR in Colombia. *Am J*  
439 *Trop Med Hyg.* 2020 Dec 14;
- 440 11. Fantinatti M, Lopes-Oliveira LAP, Cascais-Figueredo T, Austriaco-Teixeira P, Verissimo E,  
441 Bello AR, et al. Recirculation of *Giardia lamblia* Assemblage A After Metronidazole  
442 Treatment in an Area With Assemblages A, B, and E Sympatric Circulation. *Front*  
443 *Microbiol* [Internet]. 2020 Oct 22 [cited 2021 Mar 6];11. Available from:  
444 <https://www.ncbi.nlm.nih.gov/pmc/articles/PMC7642054/>
- 445 12. Forgie AJ, Drall KM, Bourque SL, Field CJ, Kozyrskyj AL, Willing BP. The impact of  
446 maternal and early life malnutrition on health: a diet-microbe perspective. *BMC Med*  
447 [Internet]. 2020 May 12 [cited 2021 Mar 26];18. Available from:  
448 <https://www.ncbi.nlm.nih.gov/pmc/articles/PMC7216331/>
- 449 13. Green R, Allen LH, Bjørke-Monsen AL, Brito A, Guéant JL, Miller JW, et al. Vitamin B 12  
450 deficiency. *Nat Rev Dis Primer.* 2017 Jun 29;3(1):1–20.
- 451 14. Langan RC, Goodbred AJ. Vitamin B12 Deficiency: Recognition and Management. *Am Fam*  
452 *Physician.* 2017 Sep 15;96(6):384–9.
- 453 15. Goraya JS. Vitamin B12 deficiency in Indian infants and children. *Paediatr Int Child Health.*  
454 2020 May;40(2):75–7.
- 455 16. Handbook of Vitamins [Internet]. CRC Press; 2013 [cited 2021 Mar 9]. Available from:  
456 [https://www.taylorfrancis.com/books/handbook-vitamins-janos-zempleni-john-suttie-jesse-](https://www.taylorfrancis.com/books/handbook-vitamins-janos-zempleni-john-suttie-jesse-gregory-iii-patrick-stover/10.1201/b15413)  
457 [gregory-iii-patrick-stover/10.1201/b15413](https://www.taylorfrancis.com/books/handbook-vitamins-janos-zempleni-john-suttie-jesse-gregory-iii-patrick-stover/10.1201/b15413)
- 458 17. Mach N, Clark A. Micronutrient Deficiencies and the Human Gut Microbiota. *Trends*  
459 *Microbiol.* 2017 Aug 1;25(8):607–10.
- 460 18. Degan PH, Taga ME, Goodman AL. Vitamin B 12 as a Modulator of Gut Microbial  
461 Ecology. *Cell Metab.* 2014 Nov;20(5):769–78.
- 462 19. Boran P, Baris HE, Kepenekli E, Erzik C, Soysal A, Dinh DM. The impact of vitamin B12  
463 deficiency on infant gut microbiota. *Eur J Pediatr.* 2020 Mar 1;179(3):385–93.
- 464 20. Rizowy GM, Poloni S, Colonetti K, Donis KC, Dobbler PT, Leistner-Segal S, et al. Is the gut  
465 microbiota dysbiotic in patients with classical homocystinuria? *Biochimie.* 2020 Jun;173:3–  
466 11.

- 467 21. Mejia R, Damania A, Jeun R, Bryan PE, Vargas P, Juarez M, et al. Impact of intestinal  
468 parasites on microbiota and cobalamin gene sequences: a pilot study. *Parasit Vectors*. 2020  
469 Apr 19;13(1):200.
- 470 22. Von Huth S, Thingholm LB, Kofoed PE, Bang C, Rühlemann MC, Franke A, et al. Intestinal  
471 protozoan infections shape fecal bacterial microbiota in children from Guinea-Bissau.  
472 Bartelt LA, editor. *PLoS Negl Trop Dis*. 2021 Mar 3;15(3):e0009232.
- 473 23. Cooper PJ, Chico ME, Platts-Mills TA, Rodrigues LC, Strachan DP, Barreto ML. Cohort  
474 Profile: The Ecuador Life (ECUAVIDA) study in Esmeraldas Province, Ecuador. *Int J*  
475 *Epidemiol*. 2015 Oct;44(5):1517–27.
- 476 24. Cimino RO, Jeun R, Juarez M, Cajal PS, Vargas P, Echazú A, et al. Identification of human  
477 intestinal parasites affecting an asymptomatic peri-urban Argentinian population using  
478 multi-parallel quantitative real-time polymerase chain reaction. *Parasit Vectors*. 2015 Jul  
479 17;8:380.
- 480 25. Bushnell B. BMap: A Fast, Accurate, Splice-Aware Aligner [Internet]. Lawrence Berkeley  
481 National Lab. (LBNL), Berkeley, CA (United States); 2014 Mar [cited 2021 Apr 2]. Report  
482 No.: LBNL-7065E. Available from: [https://www.osti.gov/biblio/1241166-bbmap-fast-](https://www.osti.gov/biblio/1241166-bbmap-fast-accurate-splice-aware-aligner)  
483 [accurate-splice-aware-aligner](https://www.osti.gov/biblio/1241166-bbmap-fast-accurate-splice-aware-aligner)
- 484 26. Chen S, Zhou Y, Chen Y, Gu J. fastp: an ultra-fast all-in-one FASTQ preprocessor.  
485 *Bioinformatics*. 2018 Sep 1;34(17):i884–90.
- 486 27. Ewels P, Magnusson M, Lundin S, Käller M. MultiQC: summarize analysis results for  
487 multiple tools and samples in a single report. *Bioinformatics*. 2016 Oct 1;32(19):3047–8.
- 488 28. O’Leary NA, Wright MW, Brister JR, Ciuffo S, Haddad D, McVeigh R, et al. Reference  
489 sequence (RefSeq) database at NCBI: current status, taxonomic expansion, and functional  
490 annotation. *Nucleic Acids Res*. 2016 Jan 4;44(D1):D733-745.
- 491 29. Buchfink B, Xie C, Huson DH. Fast and sensitive protein alignment using DIAMOND. *Nat*  
492 *Methods*. 2015 Jan;12(1):59–60.
- 493 30. Blum M, Chang HY, Chuguransky S, Grego T, Kandasaamy S, Mitchell A, et al. The  
494 InterPro protein families and domains database: 20 years on. *Nucleic Acids Res*. 2021 Jan  
495 8;49(D1):D344–54.
- 496 31. Huson DH, Beier S, Flade I, Górska A, El-Hadidi M, Mitra S, et al. MEGAN Community  
497 Edition - Interactive Exploration and Analysis of Large-Scale Microbiome Sequencing  
498 Data. *PLOS Comput Biol*. 2016 Jun 21;12(6):e1004957.
- 499 32. Parks DH, Tyson GW, Hugenholtz P, Beiko RG. STAMP: statistical analysis of taxonomic  
500 and functional profiles. *Bioinforma Oxf Engl*. 2014 Nov 1;30(21):3123–4.
- 501 33. McMurdie PJ, Holmes S. phyloseq: An R Package for Reproducible Interactive Analysis and  
502 Graphics of Microbiome Census Data. *PLOS ONE*. 2013 Apr 22;8(4):e61217.

- 503 34. R Core Team. R: A Language and Environment for Statistical Computing [Internet]. Vienna,  
504 Austria: R Foundation for Statistical Computing; 2020. Available from: [https://www.R-](https://www.R-project.org/)  
505 [project.org/](https://www.R-project.org/)
- 506 35. Wickham H, François R, Henry L, Müller K. dplyr: A Grammar of Data Manipulation  
507 [Internet]. 2021. Available from: <https://CRAN.R-project.org/package=dplyr>
- 508 36. Segata N, Waldron L, Ballarini A, Narasimhan V, Jousson O, Huttenhower C. Metagenomic  
509 microbial community profiling using unique clade-specific marker genes. *Nat Methods*.  
510 2012 Aug;9(8):811–4.
- 511 37. Oksanen J, Blanchet FG, Friendly M, Kindt R, Legendre P, McGlinn D, et al. vegan:  
512 Community Ecology Package [Internet]. 2020. Available from: [https://CRAN.R-](https://CRAN.R-project.org/package=vegan)  
513 [project.org/package=vegan](https://CRAN.R-project.org/package=vegan)
- 514 38. Mallick H, Rahnavard A, McIver LJ, Ma S, Zhang Y, Nguyen LH, et al. Multivariable  
515 association discovery in population-scale meta-omics studies. *PLOS Comput Biol*. 2021  
516 Nov 16;17(11):e1009442.
- 517 39. Martin BD, Witten D, Willis AD. Modeling microbial abundances and dysbiosis with beta-  
518 binomial regression. *Ann Appl Stat*. 2020 Mar;14(1):94–115.
- 519 40. Kuznetsova A, Brockhoff PB, Christensen RHB. lmerTest Package: Tests in Linear Mixed  
520 Effects Models. *J Stat Softw*. 2017;82(13):1–26.
- 521 41. Wickham H. ggplot2: elegant graphics for data analysis. Second edition. Cham: Springer;  
522 2016. 260 p. (Use R!).
- 523 42. Dunn N, Juergens AL. Giardiasis. In: StatPearls [Internet]. Treasure Island (FL): StatPearls  
524 Publishing; 2021 [cited 2021 Apr 16]. Available from:  
525 <http://www.ncbi.nlm.nih.gov/books/NBK513239/>
- 526 43. Roswall J, Olsson LM, Kovatcheva-Datchary P, Nilsson S, Tremaroli V, Simon MC, et al.  
527 Developmental trajectory of the healthy human gut microbiota during the first 5 years of  
528 life. *Cell Host Microbe* [Internet]. 2021 Mar 31 [cited 2021 Apr 24];0(0). Available from:  
529 [https://www.cell.com/cell-host-microbe/abstract/S1931-3128\(21\)00100-1](https://www.cell.com/cell-host-microbe/abstract/S1931-3128(21)00100-1)
- 530 44. Barash NR, Maloney JG, Singer SM, Dawson SC. Giardia Alters Commensal Microbial  
531 Diversity throughout the Murine Gut. *Infect Immun* [Internet]. 2017 May 23 [cited 2021  
532 Apr 17];85(6). Available from: <https://www.ncbi.nlm.nih.gov/pmc/articles/PMC5442636/>
- 533 45. McGregor BA, Razmjou E, Hooshyar H, Seeger DR, Golovko SA, Golovko MY, et al. A  
534 shotgun metagenomic analysis of the fecal microbiome in humans infected with *Giardia*  
535 *duodenalis*. *Parasit Vectors*. 2023 Jul 18;16(1):239.
- 536 46. Toro-Londono MA, Bedoya-Urrego K, Garcia-Montoya GM, Galvan-Diaz AL, Alzate JF.  
537 Intestinal parasitic infection alters bacterial gut microbiota in children. *PeerJ*. 2019 Jan  
538 7;7:e6200.

- 539 47. Mejia R, Damania A, Jeun R, Bryan PE, Vargas P, Juarez M, et al. Impact of intestinal  
540 parasites on microbiota and cobalamin gene sequences: a pilot study. *Parasit Vectors*. 2020  
541 Dec;13(1):200.
- 542 48. Donaldson GP, Lee SM, Mazmanian SK. Gut biogeography of the bacterial microbiota. *Nat*  
543 *Rev Microbiol*. 2016 Jan;14(1):20–32.
- 544 49. Martinez-Guryn K, Leone V, Chang EB. Regional Diversity of the Gastrointestinal  
545 Microbiome. *Cell Host Microbe*. 2019 Sep 11;26(3):314–24.
- 546 50. Motta JP, Wallace JL, Buret AG, Deraison C, Vergnolle N. Gastrointestinal biofilms in  
547 health and disease. *Nat Rev Gastroenterol Hepatol*. 2021 Jan 28;1–21.
- 548 51. Tytgat HLP, Nobrega FL, van der Oost J, de Vos WM. Bowel Biofilms: Tipping Points  
549 between a Healthy and Compromised Gut? *Trends Microbiol*. 2019 Jan 1;27(1):17–25.
- 550 52. Fekete E, Allain T, Siddiq A, Sosnowski O, Buret AG. *Giardia* spp. and the Gut Microbiota:  
551 Dangerous Liaisons. *Front Microbiol* [Internet]. 2021 Jan 12 [cited 2021 Feb 23];11.  
552 Available from: <https://www.ncbi.nlm.nih.gov/pmc/articles/PMC7835142/>
- 553 53. Scheiman J, Lubber JM, Chavkin TA, MacDonald T, Tung A, Pham LD, et al. Meta-omics  
554 analysis of elite athletes identifies a performance-enhancing microbe that functions via  
555 lactate metabolism. *Nat Med*. 2019 Jul;25(7):1104–9.
- 556 54. Rowley CA, Kendall MM. To B12 or not to B12: Five questions on the role of cobalamin in  
557 host-microbial interactions. *PLOS Pathog*. 2019 Jan 3;15(1):e1007479.
- 558 55. Wexler AG, Schofield WB, Degnan PH, Folta-Stogniew E, Barry NA, Goodman AL.  
559 Human gut *Bacteroides* capture vitamin B12 via cell surface-exposed lipoproteins. *eLife*.  
560 2018 Sep 18;7:e37138.
- 561 56. Giallourou N, Arnold J, McQuade ETR, Awoniyi M, Becket RVT, Walsh K, et al. *Giardia*  
562 hinders growth by disrupting nutrient metabolism independent of inflammatory  
563 enteropathy. *Nat Commun*. 2023 May 18;14(1):2840.

564  
565
